# Supplementary material for: Diagnostic delay in IPF impacts progression-free survival, quality of life and hospitalisation rates
Source: PubMed Central journal article supplement — BMJ Open Respir Res. 2022 Jul 7;9(1):e001276. doi: 10.1136/bmjresp-2022-001276 (PMC9263910; doi:10.1136/bmjresp-2022-001276), 2022-07-07
Supplement: bmjresp-2022-001276supp001.pdf [file bmjresp-2022-001276supp001.pdf]

## Supplementary material

### **Title: Diagnostic delay in IPF impacts progression-free survival, quality of life and hospitalisation rates**

Authors: Nils Hoyer\*<sup>1</sup>, Thomas Skovhus Prior<sup>2</sup>, Elisabeth Bendstrup<sup>2</sup>, Saher Burhan Shaker<sup>1</sup>

<sup>1</sup> Department of Respiratory Medicine, Herlev and Gentofte Hospital, Hellerup, Denmark

<sup>2</sup> Centre for Rare Lung Diseases, Department of Respiratory Diseases and Allergy, Aarhus University Hospital, Aarhus, Denmark

\* Corresponding author: Nils Hoyer, Department of Respiratory Medicine, Herlev and Gentofte Hospital, Kildegårdsvej 28, 2900 Hellerup, Denmark. E-mail: nils.hoyer@regionh.dk Telephone: +45-38674200 Fax: +45-38674212

| Symptom               | Diagnostic delay<br>< 1 year (N=78) | Diagnostic delay ><br>1 year (N=186) | Total (N=264) | p value |
|-----------------------|-------------------------------------|--------------------------------------|---------------|---------|
| Dry cough             | 24 (30.8%)                          | 57 (30.6%)                           | 81 (30.7%)    | 0.98    |
| Productive cough      | 23 (29.5%)                          | 52 (28.0%)                           | 75 (28.4%)    | 0.80    |
| Coughing up blood     | 1 (1.3%)                            | 7 (3.8%)                             | 8 (3.0%)      | 0.28    |
| Shortness of breath   | 43 (55.1%)                          | 110 (59.1%)                          | 153 (58.0%)   | 0.55    |
| Chest pain            | 10 (12.8%)                          | 19 (10.2%)                           | 29 (11.0%)    | 0.54    |
| Chest discomfort      | 6 (7.7%)                            | 23 (12.4%)                           | 29 (11.0%)    | 0.27    |
| Changed breath sounds | 13 (16.7%)                          | 21 (11.3%)                           | 34 (12.9%)    | 0.23    |
| Fever                 | 6 (7.7%)                            | 6 (3.2%)                             | 12 (4.5%)     | 0.11    |
| Fatigue               | 20 (25.6%)                          | 46 (24.7%)                           | 66 (25.0%)    | 0.88    |
| Weight loss           | 6 (7.7%)                            | 18 (9.7%)                            | 24 (9.1%)     | 0.61    |
| Other                 | 14 (17.9%)                          | 28 (15.1%)                           | 42 (15.9%)    | 0.56    |

Table E1: First IPF-related symptom, as reported by patients stratified according to diagnostic delay below or above 1 year. Patients could report multiple symptoms. P-value based on chi-squared test.

|                                         | <b>FVC ≤ 80%<br/>predicted</b> | <b>FVC &gt; 80%<br/>predicted</b> | <b>Total</b>  | <b>p<br/>value</b> |
|-----------------------------------------|--------------------------------|-----------------------------------|---------------|--------------------|
| <b>Total diagnostic delay</b>           | 1.4 (0.7-5.6)                  | 2.2 (0.9-4.9)                     | 2.0 (0.9-5.0) | 0.40               |
| <b>Emphysema at baseline,<br/>n (%)</b> | 8 (9.2%)                       | 17 (9.8%)                         | 25 (9.6%)     | 0.87               |

Table E2: Total diagnostic delay and emphysema in patients stratified according to forced vital capacity (FVC) at the time of diagnosis.

|                        | <b>Diagnostic delay &lt; 1 year (N=78)</b> | <b>Diagnostic delay &gt; 1 year (N=186)</b> | <b>Total (N=264)</b> | <b>p value</b> |
|------------------------|--------------------------------------------|---------------------------------------------|----------------------|----------------|
| Antifibrotic treatment |                                            |                                             |                      | 0.41           |
| - Nintedanib           | 23 (29.5%)                                 | 69 (37.1%)                                  | 92 (34.8%)           |                |
| - Pirfenidone          | 43 (55.1%)                                 | 96 (51.6%)                                  | 139 (52.7%)          |                |
| - No treatment         | 12 (15.4%)                                 | 21 (11.3%)                                  | 33 (12.5%)           |                |

Table E3: Antifibrotic treatment in patients with a short (< 1 year) or long (> 1 year) diagnostic delay. Patients not eligible for antifibrotic treatment according no national guidelines (FVC < 50% or DLCO < 30% predicted) did not receive specific antifibrotic therapy are included in the “No treatment” group.

|                        | <b>Diagnostic delay &lt; 1 year (N=70)</b> | <b>Diagnostic delay &gt; 1 year (N=168)</b> | <b>Total (N=238)</b> | <b>p value</b> |
|------------------------|--------------------------------------------|---------------------------------------------|----------------------|----------------|
| Antifibrotic treatment |                                            |                                             |                      | 0.39           |
| - Nintedanib           | 22 (31.4%)                                 | 67 (39.9%)                                  | 89 (37.4%)           |                |
| - Pirfenidone          | 38 (54.3%)                                 | 84 (50.0%)                                  | 122 (51.3%)          |                |
| - No treatment         | 10 (14.3%)                                 | 17 (10.1%)                                  | 27 (11.3%)           |                |

Table E4: Antifibrotic treatment in patients with a short (< 1 year) or long (> 1 year) diagnostic delay in patients eligible for antifibrotic treatment according to national guidelines. Patients not eligible (FVC < 50% or DLCO < 30% predicted) did not receive antifibrotic therapy.

|                                                                  | All patients         |                       |                       |                     | FVC ≤ 80% predicted at diagnosis |                      |                       |                     | FVC > 80% predicted at diagnosis |                       |                       |                     |
|------------------------------------------------------------------|----------------------|-----------------------|-----------------------|---------------------|----------------------------------|----------------------|-----------------------|---------------------|----------------------------------|-----------------------|-----------------------|---------------------|
|                                                                  | < 1 year<br>(N = 76) | > 1 year<br>(N = 186) | Unadjusted<br>p value | Adjusted<br>p value | < 1 year<br>(N = 28)             | > 1 year<br>(N = 58) | Unadjusted<br>p value | Adjusted<br>p value | < 1 year<br>(N = 47)             | > 1 year<br>(N = 126) | Unadjusted<br>p value | Adjusted<br>p value |
| SGRQ total score deterioration <sup>1</sup>                      | 15<br>(19.7%)        | 45<br>(24.2%)         | 0.44                  | 0.52                | 2 (7.1%)                         | 12<br>(20.7%)        | 0.11                  | 0.11                | 13<br>(27.7%)                    | 33<br>(26.2%)         | 0.85                  | 0.88                |
| SGRQ-I <sub>derived</sub> total score deterioration <sup>2</sup> | 17<br>(22.4%)        | 59<br>(31.7%)         | 0.13                  | 0.13                | 5 (17.9%)                        | 16<br>(27.6%)        | 0.33                  | 0.15                | 12<br>(25.5%)                    | 43<br>(34.1%)         | 0.28                  | 0.28                |
| CAT total score deterioration <sup>3</sup>                       | 21<br>(27.6%)        | 72<br>(38.7%)         | 0.09                  | 0.12                | 7 (25.0%)                        | 23<br>(39.7%)        | 0.18                  | 0.19                | 14<br>(29.8%)                    | 49<br>(38.9%)         | 0.27                  | 0.31                |
| Relative decrease in FVC > 10%                                   | 10<br>(13.2%)        | 31<br>(16.7%)         | 0.48                  | 0.51                | 3 (10.7%)                        | 12<br>(20.7%)        | 0.25                  | 0.30                | 7 (14.9%)                        | 19<br>(15.1%)         | 0.98                  | 0.97                |
| Relative decrease in DLCO > 15%                                  | 17<br>(22.4%)        | 63<br>(33.9%)         | 0.07                  | 0.06                | 9 (32.1%)                        | 16<br>(27.6%)        | 0.66                  | 0.40                | 8 (17.0%)                        | 47<br>(37.3%)         | 0.01                  | 0.008               |
| Death within 12 months                                           | 6 (7.9%)             | 17 (9.1%)             | 0.75                  | 0.37                | 4 (14.3%)                        | 7 (12.1%)            | 0.77                  | 0.96                | 2 (4.3%)                         | 10 (7.9%)             | 0.40                  | 0.35                |
| Fulfils definition of progressive ILD <sup>4</sup>               | 29<br>(38.2%)        | 92<br>(49.5%)         | 0.10                  | 0.05                | 14<br>(50.0%)                    | 29<br>(50.0%)        | 1.0                   | 0.95                | 15<br>(31.9%)                    | 63<br>(50.0%)         | 0.03                  | 0.03                |

Table E5: Proportion of patients with progression within the first year from diagnosis of quality of life scores, lung function measurements, death and a compound definition of progressive fibrotic interstitial lung disease (ILD). <sup>1</sup> Increase of St. George's respiratory questionnaire (SGRQ) total score of at least 4 points, previously reported as the minimal clinically important difference (MCID)[1] <sup>2</sup> Increase of the IPF-specific version of the SGRQ, derived from the original SGRQ (SGRQ-I<sub>derived</sub>) total score of at least 4 points. <sup>3</sup> Increase of the COPD assessment test (CAT) total score of at least 2, previously reported as the MCID[2] <sup>4</sup> Compound definition of progressive fibrotic ILD, based on forced vital capacity (FVC), diffusing capacity of carbon monoxide (DLCO), symptoms and progression of fibrosis on high resolution CT (HRCT) within 2 years, as previously described[3] Unadjusted p values based on chi-squared test. Adjusted p values based on logistic regression models, adjusted for age, sex, antifibrotic treatment, FVC at baseline and DLCO at baseline.

|                       | <b>HR (95% CI)</b> | <b>p-value</b> |
|-----------------------|--------------------|----------------|
| Entire cohort         |                    |                |
| - Model A             | 1.70 (1.18–2.46)   | 0.004          |
| - Model B             | 1.62 (1.13–2.33)   | 0.009          |
| FVC > 80% at baseline |                    |                |
| - Model A             | 2.43 (1.45–4.01)   | < 0.001        |
| - Model B             | 2.47 (1.47–4.14)   | < 0.001        |
| FVC ≤ 80% at baseline |                    |                |
| - Model A             | 0.91 (0.51–1.62)   | 0.76           |
| - Model B             | 0.85 (0.48–1.51)   | 0.57           |

Table E6: Sensitivity analysis of the multivariate cox proportional hazards analysis for the association between diagnostic delay (< 1 year or > 1 year) and progression-free survival.

Model A (presented in the main manuscript): adjusted for age, sex, FVC % predicted at baseline, DLCO % predicted at baseline and antifibrotic treatment.

Model B: adjusted for age, sex, FVC % predicted at baseline, DLCO % predicted at baseline, antifibrotic treatment and emphysema (yes/no)

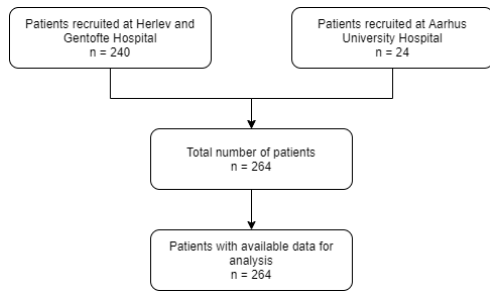

Figure E1: Flowchart of recruitment and follow-up of patients



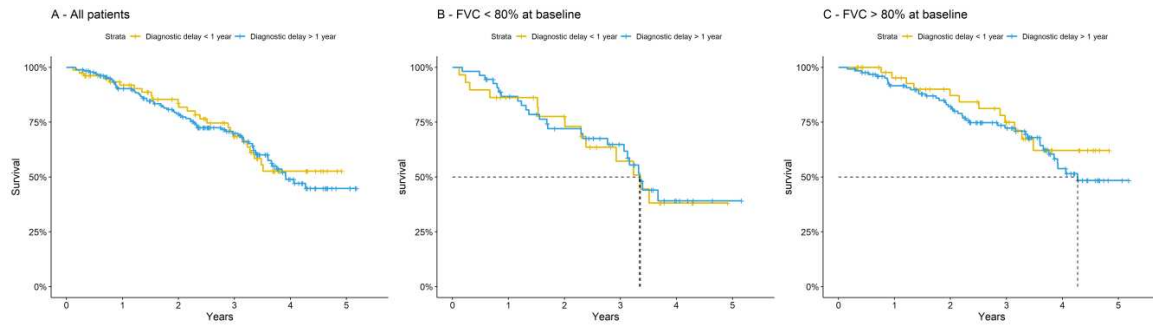

Figure E2: All-cause survival in patients with a short or long diagnostic delay in patients in subgroups based on FVC % of predicted at the time of diagnosis

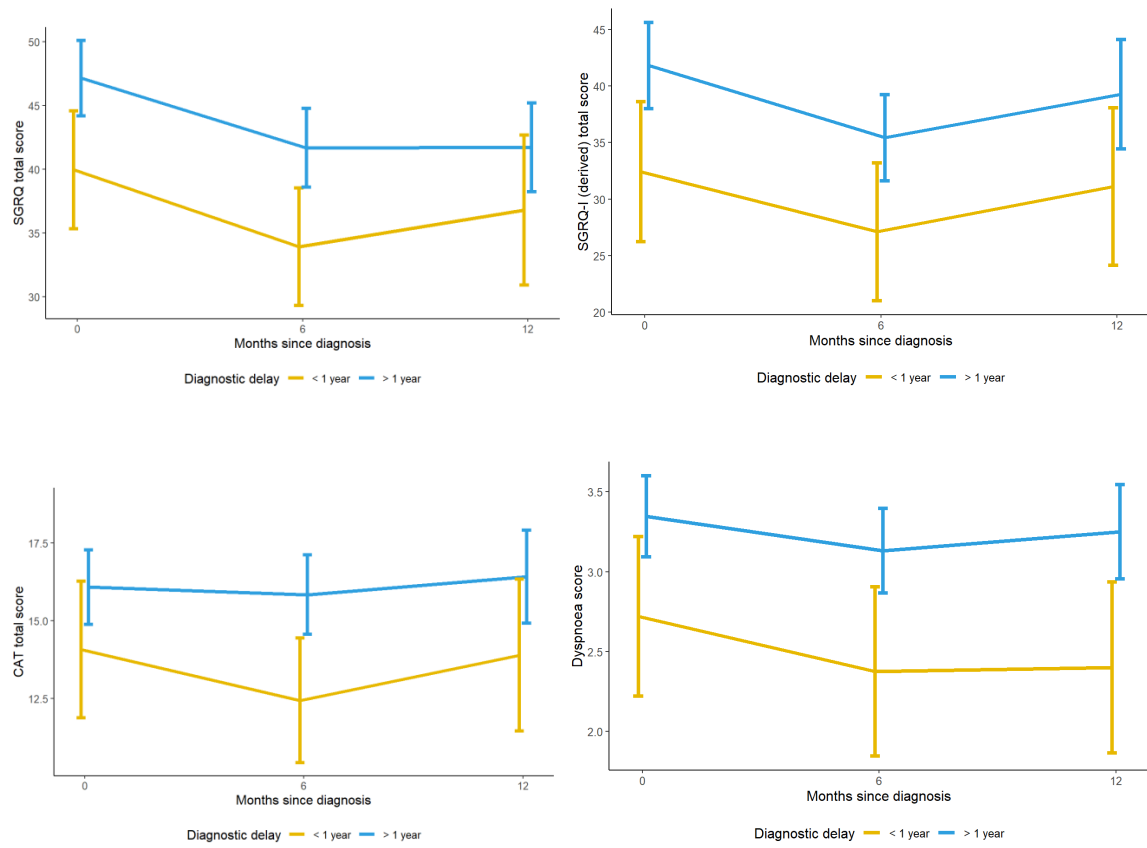

Figure E3: Change in Quality of life scores for patients with a short or long diagnostic delay and FVC>80% predicted at baseline.

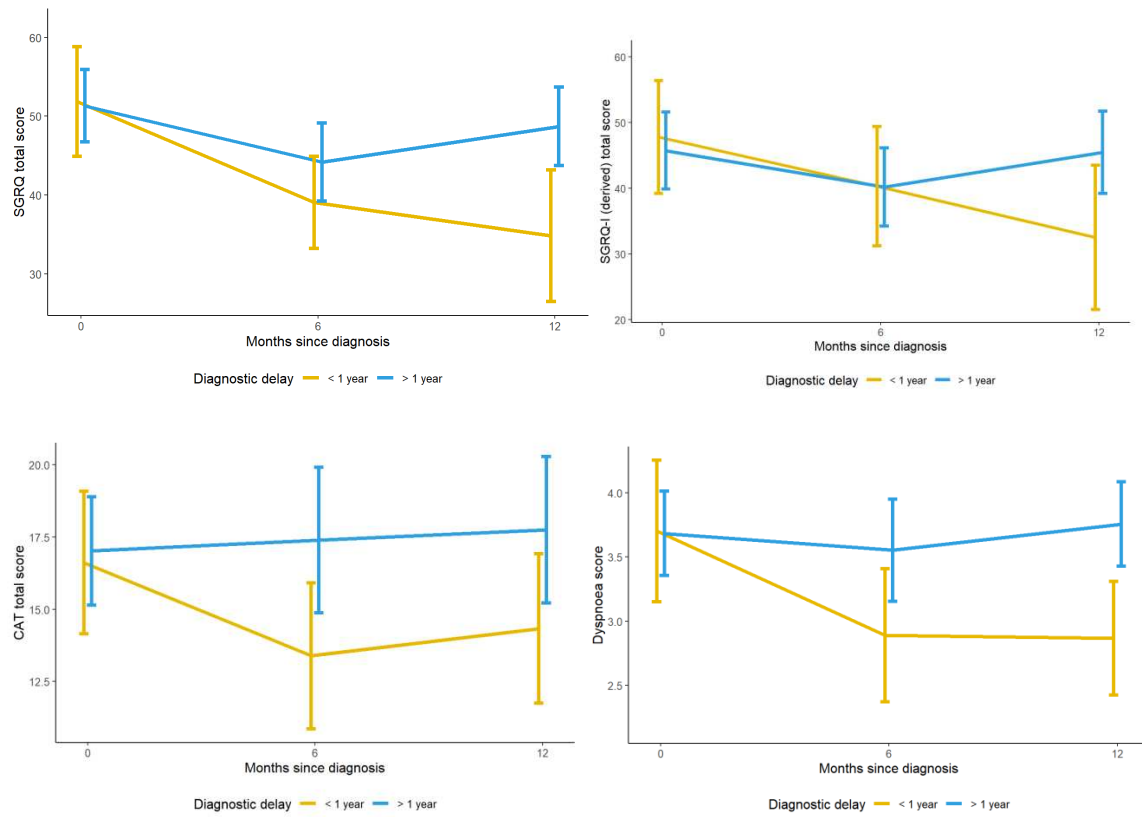

Figure E4: Quality of life scores for patients with a short or long diagnostic delay and FVC $\leq$ 80% predicted at baseline.

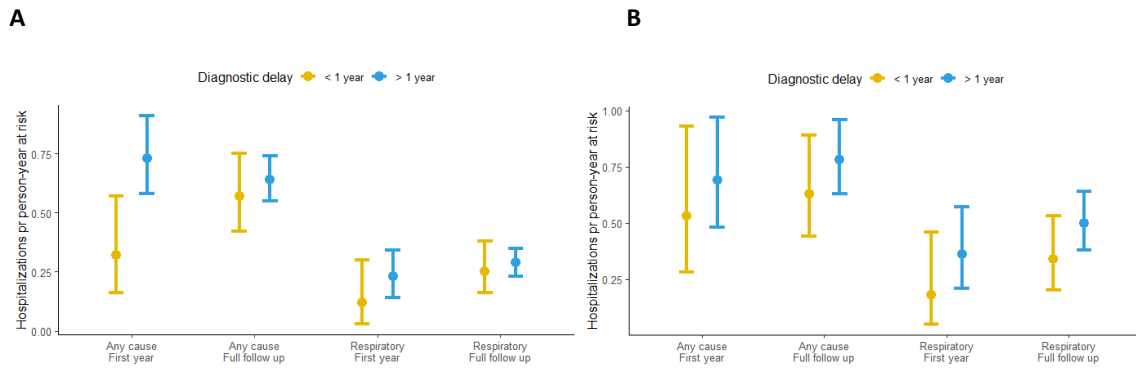

Figure E5: Hospitalisation rates in subgroups with baseline FVC > 80% predicted (A) and ≤ 80% predicted (B)

1. Jones Paul W. St. George's respiratory questionnaire: MCID. *COPD J. Chronic Obstr. Pulm. Dis.* 2005; 2: 75–79.
2. Kon Samantha SC, Canavan Jane L, Jones Sarah E, et al. Minimum clinically important difference for the COPD Assessment Test: A prospective analysis. *Lancet Respir. Med.* [Internet] Elsevier Ltd; 2014; 2: 195–203 Available from: [http://dx.doi.org/10.1016/S2213-2600\(14\)70001-3](http://dx.doi.org/10.1016/S2213-2600(14)70001-3).
3. George Peter M, Spagnolo Paolo, Kreuter Michael, et al. Progressive fibrosing interstitial lung disease: clinical uncertainties, consensus recommendations, and research priorities. *Lancet Respir. Med.* [Internet] Elsevier Ltd; 2020; 8: 925–934 Available from: [http://dx.doi.org/10.1016/S2213-2600\(20\)30355-6](http://dx.doi.org/10.1016/S2213-2600(20)30355-6).
